# Supplementary material for: Multi-scale isotopic heterogeneity reveals a complex magmatic evolution: An example from the wallundry suite granitoids of the lachlan fold belt, Australia
Source: Frontiers journal article supplement (doi:10.3389/feart.2023.1101331), 2023-02-17
Supplement: Table_1.XLS [file Table_1.XLS]

## Sheet: GA data
Full Geoscience Australia bulk-rock dataset:
BatchNo	SampleID	Ag ICP-MS	Al2O3 XRF	As ICP-MS	As XRF	Ba ICP-MS	Ba XRF	Be ICP-MS	Bi ICP-MS	CaO XRF	Cd ICP-MS	Ce ICP-MS	Cr XRF	Cs ICP-MS	Cu XRF	Dy ICP-MS	Er ICP-MS	Eu ICP-MS	F XRF	Fe2O3T XRF	FeO TIT	Ga ICP-MS	Gd ICP-MS	Ge ICP-MS	Hf ICP-MS	Ho ICP-MS	K2O XRF	La ICP-MS	Lu ICP-MS	MgO XRF	MLOI Calculate	MnO XRF	Mo ICP-MS	Na2O XRF	Nb ICP-MS	Nd ICP-MS	Ni XRF	P2O5 XRF	Pb ICP-MS	Pb XRF	Pr ICP-MS	Rb ICP-MS	Rb XRF	Sb ICP-MS	Sc ICP-MS	Sc XRF	SiO2 XRF	Sm ICP-MS	Sn ICP-MS
		ppm	%	ppm	ppm	ppm	ppm	ppm	ppm	%	ppm	ppm	ppm	ppm	ppm	ppm	ppm	ppm	ppm	%	%	ppm	ppm	ppm	ppm	ppm	%	ppm	ppm	%	%	%	ppm	%	ppm	ppm	ppm	%	ppm	ppm	ppm	ppm	ppm	ppm	ppm	ppm	%	ppm	ppm
30029	2129611	0.93	15.557	1.7	0.6	254.7	236	1.1	0.13	9.342	0.54	44.33	5	0.72	50	11.01	6.34	2.9794	827	14.173	10.118	23.7	10.647	1.7	3.92	2.25	0.627	19.03	0.722	4.991	2.09	0.208	0.5	3.6	14.8	31.04	11	0.168	3.98	5	6.5	16.3	15.9	-0.8	47.7	42	47.253	8.654	1.5
30029	2129612	0.73	17.028	1.2	-0.5	236.7	225	1.1	0.12	9.78	0.18	33.88	3	1.33	20	5.784	3.23	2.492	469	13.97	10.258	20.4	6.094	1.61	2.41	1.146	0.542	16.09	0.415	4.192	1.52	0.226	1.1	3.049	17.8	22.32	5	0.274	4.35	5	4.95	12.3	13	-0.8	54.8	49	47.538	5.817	-0.1
30029	2129613	0.92	16.019	2.7	-0.5	243.5	225	0.9	0.34	8.945	0.29	29.61	15	1.25	53	5.159	3.044	1.8187	468	13.826	10.219	18.8	5.05	1.65	2.66	1.08	0.649	14.34	0.399	5.017	1.95	0.209	0.4	2.79	14	17.34	13	0.18	5.02	6	3.91	21.1	21.3	-0.8	42.6	38	47.193	4.451	1.4
30029	2129614	0.87	15.157	1.4	1.1	183.1	166	0.9	0.27	10.246	0.3	31.43	-1	1.84	37	7.164	3.948	2.1812	497	14.389	10.839	18.7	6.849	1.76	2.5	1.482	0.431	13.99	0.5	4.942	1.41	0.233	0.6	3.087	14.9	22.41	-1	0.243	3.05	4	4.53	10	10.1	-0.8	50.2	50	47.001	5.478	-0.1
30029	2129615	0.85	15.053	1.1	1.2	201.3	183	0.8	0.07	9.609	0.31	31.72	-1	0.66	38	6.802	3.845	2.34	433	15.032	11.296	18.7	6.461	1.61	3.05	1.417	0.452	14.4	0.481	5.134	1.26	0.246	0.4	3.175	17.3	20.72	3	0.221	3.63	7	4.41	10.4	11.4	-0.8	48.7	49	46.856	5.012	1
30029	2129616	0.96	16.867	1.7	0.9	238.1	215	0.7	0.32	7.905	0.04	26.8	57	0.69	84	4.518	2.549	1.5416	451	15.198	10.975	18.2	4.301	1.27	2.52	0.907	0.581	13.06	0.363	5.764	2.29	0.186	0.7	3.083	8.4	15.65	40	0.17	3.96	7	3.48	15.8	16.3	-0.8	26	20	45.519	4.096	0.4
30029	2129617	0.79	15.194	1.7	3.5	220.4	203	1	0.06	8.938	0.46	34.87	2	0.56	23	6.456	3.893	1.9927	472	14.191	10.654	19.8	6.492	1.57	2.89	1.328	0.63	16.48	0.482	4.681	1.77	0.222	-0.3	3.543	17.6	21.48	8	0.223	4.39	6	4.83	18.1	18.1	-0.8	33.8	44	47.469	5.898	1.6
30029	2129618	0.91	16.98	1.8	2.6	251.4	223	1	0.12	8.185	0.08	32.16	4	1.16	56	5.348	3.032	1.642	473	14.655	10.557	19.7	4.768	1.39	2.91	1.124	0.517	16.15	0.423	5.783	2.23	0.188	0.5	3.133	9.2	17.01	31	0.15	3.89	6	3.88	12.9	12.3	-0.8	24.9	21	46.208	4.298	-0.1
30029	2129619	0.82	16.724	1.6	2.6	269.4	247	1.1	0.16	8.663	0.21	45.74	-1	1.14	55	7.472	4.526	1.9895	510	14.16	9.755	21.5	7.392	1.44	3.76	1.657	0.665	19.76	0.606	5.236	3.03	0.175	0.3	3.3	11.6	27.66	16	0.166	4.2	5	6.27	17.1	16.6	-0.8	32.9	27	46.25	6.505	-0.1
30029	2129620	0.84	20.383	1.7	0.6	340.4	309	1.1	0.25	8.546	0.08	48.92	10	2.48	9	6.169	3.196	3.4979	572	10.404	7.681	23.9	7.45	1.31	2.44	1.228	1.137	24.57	0.352	2.758	1.87	0.171	0.4	3.776	13.4	29.75	9	0.655	4.34	5	6.7	33.5	31.5	-0.8	33.4	21	48.333	7.435	0.4
30029	2129621	0.75	18.422	1.8	6.3	258	244	1.3	0.08	9.584	0.24	37.18	10	1.91	15	5.047	2.706	2.2899	416	13.835	10.461	22	5.245	1.52	2.98	1.01	0.676	18.23	0.327	3.431	1.61	0.234	0.7	2.944	14	20.05	8	0.177	3.82	8	4.7	20.1	20.1	-0.8	47.7	41	47.248	4.141	1.1
30029	2129622	0.95	16.309	1.6	0.6	485.8	473	1.3	-0.02	6.488	0.31	69.79	-1	0.81	10	11.003	5.993	4.4824	456	13.012	9.73	21.1	11.949	1.65	8.09	2.347	0.784	31.38	0.829	2.306	1.11	0.332	0.9	4.789	49.4	46.31	-1	0.609	4.37	7	9.93	14.6	15.5	-0.8	36.7	34	52.576	10.803	-0.1
30029	2129623	0.79	19.042	2.3	-0.5	248.2	233	1	0.07	9.664	0.2	35.85	6	2.1	12	5.336	2.96	2.4898	440	12.954	9.469	21	5.37	1.56	2.72	1.101	0.646	17.67	0.359	3.291	1.59	0.236	0.5	3.046	14.3	20.29	7	0.16	4.18	5	4.76	18.7	19.4	-0.8	45.4	37	48.039	4.648	0.1
30029	2129624	0.82	16.457	1.7	-0.5	273.8	262	1	0.07	9.053	0.16	23.07	7	0.45	28	3.834	2.277	1.6628	380	13.981	3.312	20.6	3.722	1.49	1.98	0.762	0.654	12.06	0.269	4.807	2.3	0.208	0.4	2.574	12.2	13.32	12	0.142	4.5	6	3.08	24	24.2	-0.8	44.8	33	48.018	2.824	0.9
30029	2129625	0.83	16.513	1.8	1.3	303.5	288	1.1	0.03	8.429	0.27	38.22	-1	0.51	29	7.074	4.267	2.4692	481	12.444	2.85	20.8	6.964	1.67	3.13	1.511	0.67	17.95	0.57	4.204	1.7	0.215	0.5	3.82	14.9	23.21	-1	0.224	4.16	6	5.13	16.9	17.2	-0.8	41.9	33	49.835	6.293	-0.1
30029	2129626	0.83	14.463	1.2	-0.5	955.1	883	2.9	0.04	1.746	0.21	101.9	-1	2.32	-1	9.766	6.087	2.0074	893	3.412	2.264	20.6	9.465	1.78	9.5	2.032	3.357	52.91	0.81	0.192	1.98	0.078	0.4	4.802	25.4	45.19	-1	0.055	7.58	6	11.82	130.1	128.1	-0.8	10.4	9	69.807	9.451	1.6
30029	2129628	0.93	14.518	1.8	-0.5	977.8	920	3.3	0.25	1.656	0.4	117.67	-1	7.63	-1	13.577	8.239	2.5108	1160	3.518	1.436	23	13.178	1.72	11.33	2.905	3.482	62.01	1.16	0.113	0.89	0.097	1.2	4.916	25.5	56.77	2	0.042	17.28	16	14.22	119.3	118.6	-0.8	12.8	12	70.971	12.877	4.1
30029	2129629	0.9	17.689	1.7	-0.5	978.8	912	2.1	0.08	4.885	0.22	86.68	-1	0.87	5	10.527	6.472	4.674	484	8.437	5.126	27.4	11.332	1.66	10.13	2.284	1.519	44.56	0.876	0.873	1.33	0.187	1.4	5.778	16.6	48.06	1	0.272	9.68	9	11.24	38.2	36.4	-0.8	30.9	26	59.354	11.098	2.7
Compiled major element oxides:
	SiO2 XRF	TiO2 XRF	Al2O3 XRF	Fe2O3T XRF	FeO TIT	MnO XRF	MgO XRF	CaO XRF	Na2O XRF	K2O XRF	P2O5 XRF	SO3 XRF	MLOI Calculate
	%	%	%	%	%	%	%	%	%	%	%	%	%
2129611	47.253	2.404	15.557	14.173	10.118	0.208	4.991	9.342	3.6	0.627	0.168	0.146	2.09
2129612	47.538	2.768	17.028	13.97	10.258	0.226	4.192	9.78	3.049	0.542	0.274	0.092	1.52
2129613	47.193	3.255	16.019	13.826	10.219	0.209	5.017	8.945	2.79	0.649	0.18	0.027	1.95
2129614	47.001	3.467	15.157	14.389	10.839	0.233	4.942	10.246	3.087	0.431	0.243	0.047	1.41
2129615	46.856	3.67	15.053	15.032	11.296	0.246	5.134	9.609	3.175	0.452	0.221	0.071	1.26
2129616	45.519	2.319	16.867	15.198	10.975	0.186	5.764	7.905	3.083	0.581	0.17	0.014	2.29
2129617	47.469	3.04	15.194	14.191	10.654	0.222	4.681	8.938	3.543	0.63	0.223	0.007	1.77
2129618	46.208	2.142	16.98	14.655	10.557	0.188	5.783	8.185	3.133	0.517	0.15	0.011	2.23
2129619	46.25	2.297	16.724	14.16	9.755	0.175	5.236	8.663	3.3	0.665	0.166	0.104	3.03
2129620	48.333	1.689	20.383	10.404	7.681	0.171	2.758	8.546	3.776	1.137	0.655	0.021	1.87
2129621	47.248	2.278	18.422	13.835	10.461	0.234	3.431	9.584	2.944	0.676	0.177	0.013	1.61
2129622	52.576	1.551	16.309	13.012	9.73	0.332	2.306	6.488	4.789	0.784	0.609	0.013	1.11
2129623	48.039	2.145	19.042	12.954	9.469	0.236	3.291	9.664	3.046	0.646	0.16	0.018	1.59
2129624	48.018	3.032	16.457	13.981	3.312	0.208	4.807	9.053	2.574	0.654	0.142	0.017	2.3
2129625	49.835	2.569	16.513	12.444	2.85	0.215	4.204	8.429	3.82	0.67	0.224	0.006	1.7
2129626	69.807	0.275	14.463	3.412	2.264	0.078	0.192	1.746	4.802	3.357	0.055	0.005	1.98
2129628	70.971	0.244	14.518	3.518	1.436	0.097	0.113	1.656	4.916	3.482	0.042	0.007	0.89
2129629	59.354	0.768	17.689	8.437	5.126	0.187	0.873	4.885	5.778	1.519	0.272	0.008	1.33
[truncated: 15 more columns]

## Sheet: GA RMs
XRF Majors+Traces data
Seq.	Sample name (1-20)	SiO2	TiO2	Al2O3	Fe2O3	MnO	MgO	CaO	Na2O	K2O	P2O5	SO3	Sc	V	Cr	Ni	Cu	Zn	Rb	Sr	Zr	Ba	Cl	As	Y	Nb	La	Ce	Nd	Pb	Th	U	Cs	Mo	F
		Si	Ti	Al	Fe	Mn	Mg	Ca	Na	K	P	S2	Sc	V	Cr	Ni	Cu	Zn	Rb	Sr	Zr	Ba	Cl	As	Y	Nb	La	Ce	Nd	Pb	Th	U	Cs	Mo	F
		(%)	(%)	(%)	(%)	(%)	(%)	(%)	(%)	(%)	(%)	(%)	(ppm)	(ppm)	(ppm)	(ppm)	(ppm)	(ppm)	(ppm)	(ppm)	(ppm)	(ppm)	(ppm)	(ppm)	(ppm)	(ppm)	(ppm)	(ppm)	(ppm)	(ppm)	(ppm)	(ppm)	(ppm)	(ppm)	(ppm)
22	AGV-2	59.371	1.032	16.96	6.74	0.101	1.799	5.2	4.181	2.873	0.47	0.006	11.8	118.5	11.5	17.1	51.9	87.6	69.8	651.4	232.9	1116	28	3.5	14.4	15.6	31	62	19	13.9	-19.1	15.5	-1	7.1	1032
23	GS-N	65.901	0.658	14.738	3.668	0.054	2.267	2.44	3.696	4.636	0.279	0.03	13.9	61.5	53.7	44.9	22.2	42.7	182	557	228.2	1350	341	4.6	8.8	26	72	108	62	36	18.9	24	-9	3.5	1468
1	AC-E	70.649	0.105	14.824	2.476	0.058	0.016	0.347	6.601	4.493	0.019	0.01	-2.9	1.1	4.8	12.7	4.1	223.2	143.6	6.6	792	56	235	5.4	186.9	112.8	44	137	91	24.1	-10	20.3	10	-2	2753
2	BHVO-2	49.866	2.727	13.579	12.34	0.172	7.278	11.371	2.209	0.52	0.27	0.043	33.4	334.1	283.5	135.3	121	102.1	4.7	383.7	158.4	142	42	1.5	26.4	21.4	-2	34	38	9.2	29.1	5.2	16	-2.2	776
XRF Fluorine
Seq.	Sample name (1-20)	F
		F1
		(ppm)
20	BHVO-2	384.4
21	OShBo	11261.9
								1.99	0.4	1.6	0.74	0.9	1.4	220	32			103	756	37	1210	282	5.1		1.4	10	0.42	1.46	590	145	251	24	82	11.7	3.4	1.37	8.6	7.6	1.43	4.2	4	0.54	26.52	36.7	4.7	11.5	0.14	30	8.06
																				37			5.6		1.3	4	0.79	1.39				24.2	77.1	11.7	3.33	1.34	8.5	7.7	1.41	4	4.1	0.6	26.7	15.6	2.5	13.1	0.08	26.8	8.1
XRF traces data								3.9	0.3	1.4	0.67	0.8	0.9	193	11			100	737	41	1220	260	5.1		1.27	5	0.41	1.47	590	144	251	23.71	77.3	11.6	3.31	1.34	8.5	7.58	1.4	4	4.1	0.59	25.6	16.5	3.51	11.5	0.14	27.4	7.8
Seq.	Sample name (1-20)	Sc	V	Cr	Co	Ni	Cu	Zn	Ga	Ge	As	Se	Br	Rb	Sr	Y	Zr	Nb	Mo	Ag	Cd	Sn	Sb	Cs	Ba	La	Ce	Nd	Yb	Hf	Ta	W	Tl	Pb	Bi	Th	U
		Sc	V	Cr	Co	Ni	Cu	Zn	Ga	Ge	As	Se	Br	Rb	Sr	Y	Zr	Nb	Mo	Ag	Cd	Sn	Sb	Cs	Ba	La	Ce	Nd	Yb	Hf	Ta	W	Tl	Pb	Bi	Th	U
		(ppm)	(ppm)	(ppm)	(ppm)	(ppm)	(ppm)	(ppm)	(ppm)	(ppm)	(ppm)	(ppm)	(ppm)	(ppm)	(ppm)	(ppm)	(ppm)	(ppm)	(ppm)	(ppm)	(ppm)	(ppm)	(ppm)	(ppm)	(ppm)	(ppm)	(ppm)	(ppm)	(ppm)	(ppm)	(ppm)	(ppm)	(ppm)	(ppm)	(ppm)	(ppm)	(ppm)
2	DNC-1	24.4	144.1	263.1	52.4	279.4	90.2	65.5	14.7	0.6	2.7	0.3	0.1	3.8	142.1	18.7	34.5	1	0.2	7.6	8.3	1.6	-0.4	-2.5	108.3	3	-0.8	0.4	-12.3	0.8	0.5	4.5	0.8	7.2	0.2	1.2	-0.3
3	DR-N	27.2	219.9	30.8	34.7	17.2	45.9	155	19.8	0.6	1.6	-0.1	0.8	70.3	388.3	29.2	124.7	6.7	1	8.5	11.7	0.3	-3.3	4.4	396	19.6	42.7	26.2	-15.7	4.7	0.9	132.8	-0.6	56.3	1.1	5.6	4.2
4	AC-E	-0.1	-2.2	2.6	1.6	1.9	4.4	231.6	41	0.7	3.4	0.4	0.2	149.6	2	199.9	852.3	119.9	3.2	3.1	5.3	16	-1.9	10.5	55.5	54.6	159.7	87.6	15.6	31.3	8.1	13.6	-0.1	39.5	0.3	22.4	8
ICPMS
Sample							9 Be [ 1 ]	45 Sc [ 1 ]	51 V [ 1 ]	52 Cr [ 1 ]	59 Co [ 1 ]	60 Ni [ 1 ]	63 Cu [ 1 ]	66 Zn [ 1 ]	71 Ga [ 1 ]	74 Ge [ 1 ]	75 As [ 1 ]	85 Rb [ 1 ]	88 Sr [ 1 ]	89 Y [ 1 ]	90 Zr [ 1 ]	93 Nb [ 1 ]	95 Mo [ 1 ]	107 Ag [ 1 ]	111 Cd [ 1 ]	118 Sn [ 1 ]	121 Sb [ 1 ]	133 Cs [ 1 ]	137 Ba [ 1 ]	139 La [ 1 ]	140 Ce [ 1 ]	141 Pr [ 1 ]	146 Nd [ 1 ]	152 Sm [ 1 ]	153 Eu [ 1 ]	159 Tb [ 1 ]	160 Gd [ 1 ]	163 Dy [ 1 ]	165 Ho [ 1 ]	166 Er [ 1 ]	172 Yb [ 1 ]	175 Lu [ 1 ]	178 Hf [ 1 ]	181 Ta [ 1 ]	182 W [ 1 ]	208 Pb [ 1 ]	209 Bi [ 1 ]	232 Th [ 1 ]	238 U [ 1 ]
			Acq. Date-Time		Ref	Sample Name	Conc. [ ppm ]	Conc. [ ppm ]	Conc. [ ppm ]	Conc. [ ppm ]	Conc. [ ppm ]	Conc. [ ppm ]	Conc. [ ppm ]	Conc. [ ppm ]	Conc. [ ppm ]	Conc. [ ppm ]	Conc. [ ppm ]	Conc. [ ppm ]	Conc. [ ppm ]	Conc. [ ppm ]	Conc. [ ppm ]	Conc. [ ppm ]	Conc. [ ppm ]	Conc. [ ppm ]	Conc. [ ppm ]	Conc. [ ppm ]	Conc. [ ppm ]	Conc. [ ppm ]	Conc. [ ppm ]	Conc. [ ppm ]	Conc. [ ppm ]	Conc. [ ppm ]	Conc. [ ppm ]	Conc. [ ppm ]	Conc. [ ppm ]	Conc. [ ppm ]	Conc. [ ppm ]	Conc. [ ppm ]	Conc. [ ppm ]	Conc. [ ppm ]	Conc. [ ppm ]	Conc. [ ppm ]	Conc. [ ppm ]	Conc. [ ppm ]	Conc. [ ppm ]	Conc. [ ppm ]	Conc. [ ppm ]	Conc. [ ppm ]	Conc. [ ppm ]
			2012-04-24 13:42:41			AC-E	12.7852	<0.000	0.473962	3.46327	0.765471	5.26025	6.33695	221.122	40.0559	2.07999	3.17637	145.831	2.44272	198.197	812.73	115.086	2.56091	1.06072	0.720211	25.5866	0.306125	2.85157	57.5419	63.3729	162.424	22.4681	97.121	27.1487	2.08755	5.23562	28.1721	33.776	7.078	20.3078	18.9874	2.70234	28.0962	6.02236	0.827601	38.0446	0.7205	19.604	4.35745
			Reference values:	AC-E	1		12		3	3.4	0.2	1.5	4	224	39	2.3	2.3	152	3	184	780	110	2.5	0.1	0.6	13	0.4	3	55	59	154	22.2	92	24.2	2	4.8	26	29	6.5	17.7	17.4	2.45	27.9	6.4	1.5	39	0.4	18.5	4.6
			2012-04-24 12:13:55			AGV-2B	2.27719	12.0593	115.512	16	15.0743	19.1023	50.6752	80.673	19.4628	1.24815	1.61347	66.9901	652.548	19.5438	226.876	14.2669	2.28307	0.791423	0.267409	2.09443	0.379644	1.24336	1161.94	38.2143	70.635	8.10748	31.1697	5.42694	1.78518	0.776785	5.10511	4.15646	0.75457	2.09644	1.98661	0.267449	5.53185	0.827969	0.472866	13.0249	0.122255	6.05529	1.84055
			2012-04-24 12:44:54			AGV-2B	2.13716	12.2742	116.158	16.3256	15.1229	22.0517	53.1007	86.6696	20.6263	1.23592	1.56735	66.4878	652.138	19.1358	226.232	14.0519	1.74405	0.811087	0.248974	2.05301	0.296992	1.19074	1147.37	39.108	68.8648	8.03201	31.3372	5.5301	1.55045	0.687596	4.64408	3.60699	0.684199	1.8528	1.75214	0.247083	5.14527	0.741396	0.348601	12.8811	0.102296	6.14586	1.8067
			2012-04-24 13:08:04			AGV-2B	2.30928	12.2172	115.851	15.9836	15.4287	21.2189	51.213	85.1651	19.5541	1.20544	1.28418	69.7387	646.446	18.6832	221.678	14.7456	2.15512	0.823166	0.115177	2.36573	0.384742	1.17219	1141.95	37.8759	67.9724	8.02055	30.2322	5.36579	1.60764	0.696816	4.75849	3.94938	0.69248	1.92276	1.8668	0.280118	5.29892	0.835787	0.334509	12.9761	0.151779	6.10605	1.7294
			2012-04-24 12:13:55			AGV-2B	2.26942	11.9265	116.991	16.0081	15.3342	18.3539	51.5795	79.9792	19.4629	1.20993	1.67138	65.9285	648.057	20.1186	232.166	13.8108	2.46492	0.790591	0.273626	1.48004	0.449047	1.24736	1169.58	38.2852	71.7344	8.22891	32.0253	5.62885	1.78562	0.786071	5.23381	4.32498	0.809396	2.11017	2.0075	0.289667	5.65368	0.849715	0.448704	13.1441	0.12463	6.11953	1.84798
			2012-04-24 12:44:54			AGV-2B	2.12775	12.1388	117.645	16.3306	15.3836	21.0799	54.0493	86.1085	20.6299	1.19549	1.62356	65.4339	647.65	19.6976	231.506	13.6029	1.92631	0.809086	0.254762	1.41174	0.365914	1.19504	1154.92	39.1809	69.9368	8.15225	32.1975	5.7352	1.54928	0.696276	4.76079	3.76171	0.733872	1.86289	1.77138	0.268178	5.25823	0.761061	0.322414	12.9989	0.104117	6.21094	1.81395
			2012-04-24 13:08:04			AGV-2B	2.30187	12.0825	117.334	15.9919	15.6946	20.3102	52.1271	84.5706	19.5545	1.15951	1.32997	68.6342	641.998	19.2304	226.842	14.2738	2.33707	0.820447	0.117855	1.92737	0.454175	1.17661	1149.46	37.9462	69.0305	8.14062	31.0619	5.56581	1.60685	0.705559	4.87818	4.1127	0.742759	1.9339	1.88684	0.303034	5.4154	0.85772	0.308092	13.0948	0.154974	6.17076	1.73621
			2012-04-24 13:47:54			AGV-2B	2.24066	12.1546	112.505	15.374	15.3283	19.0968	50.0407	83.0106	19.5802	1.16218	1.52666	66.0935	634.057	19.5862	224.187	13.3444	1.74569	0.784138	0.214544	2.15654	0.327284	1.19145	1143.81	37.766	67.5782	8.00134	30.1913	5.69279	1.54283	0.663915	4.53101	3.75927	0.668003	1.87273	1.70397	0.224301	5.01051	0.771899	0.317439	12.8444	0.113237	5.73658	1.7907
			Reference values:	AGV-2	2		2.209	13.11	118.5	16.22	15.46	18.87	51.51	86.7	20.42			67.79	659.5	19.14	232	14.12	2		0.184	1.83	0.458	1.173	1134	38.21	69.43	8.165	30.49	5.509	1.553	0.651	4.678	3.549	0.6818	1.825	1.653	0.2507	5.137	0.865	0.553	13.14	0.052	6.174	1.885
			2012-04-24 12:16:29			BCR-2B	2.22078	33.2727	417.854	15.6617	37.2273	12.3841	17.5221	132.402	22.3372	1.64624	1.84128	47.9057	345.387	35.9669	182.455	12.6405	254.809	0.777989	0.386869	2.79242	0.138554	1.13166	705.377	26.0673	54.5213	6.84404	29.1297	7.25673	2.2158	1.21345	7.27367	7.25982	1.45647	4.26692	3.9209	0.495404	4.94516	0.750083	0.470032	10.4182	0.127522	6.01021	1.65463
			2012-04-24 12:47:29			BCR-2B	2.15248	31.9543	414.946	14.5559	36.694	11.7372	16.6575	123.472	21.6734	1.4952	1.96032	47.6187	334.982	35.1425	177.412	12.7091	250	0.760993	0.409547	2.29063	0.118261	1.22973	685.971	25.2313	52.6168	6.72975	29.7039	6.18595	2.10271	1.11948	6.75635	6.78018	1.32924	3.67408	3.45878	0.502436	4.56063	0.740035	0.32343	10.3672	0.10933	5.94424	1.65209
			2012-04-24 14:21:46			BCR-2B	2.15906	33.8674	413.544	15.0171	36.8612	13.4964	17.3563	123.338	20.745	1.68997	1.87828	46.798	339.751	36.4113	177.188	12.4444	245.368	0.758701	0.36834	2.39145	0.191349	1.15346	686.123	26.0151	53.0571	6.69879	28.2846	7.06327	2.03499	1.10595	6.5905	6.13668	1.33532	3.91802	3.54121	0.470738	4.4797	0.713909	0.352388	9.92905	0.132033	5.97505	1.59412
			2012-04-24 12:16:29			BCR-2B	2.21218	32.8831	422.9	15.6739	37.8611	12.1479	17.8205	132.84	22.3456	1.67872	1.90758	47.1412	343.056	37.0673	186.673	12.2379	254.806	0.778165	0.395864	2.62198	0.206856	1.13636	709.823	26.1124	55.3703	6.9456	29.9289	7.51537	2.21915	1.22572	7.45871	7.50659	1.56269	4.31309	3.95543	0.530215	5.0535	0.769965	0.44568	10.5132	0.130039	6.07407	1.66102
			2012-04-24 12:47:29			BCR-2B	2.14309	31.5807	419.957	14.5787	37.3189	11.55	16.94	123.713	21.6798	1.5004	2.031	46.8587	332.724	36.2165	181.508	12.3041	250	0.762179	0.419069	1.79462	0.186444	1.23385	690.282	25.2746	53.4362	6.82951	30.519	6.41148	2.10527	1.13111	6.92795	7.01491	1.42614	3.71137	3.49006	0.537635	4.66014	0.759676	0.29669	10.4617	0.111342	6.00748	1.65846
			2012-04-24 14:21:46			BCR-2B	2.14974	33.4707	418.539	15.0355	37.4889	13.1759	17.6516	123.577	20.7486	1.73035	1.94594	46.0508	337.46	37.5259	181.279	12.0482	245.371	0.760024	0.376904	1.96086	0.259958	1.15804	690.435	26.0601	53.8834	6.79806	29.0604	7.31593	2.0371	1.11749	6.75779	6.35524	1.43267	3.95896	3.57307	0.504191	4.57735	0.732922	0.326119	10.0196	0.134675	6.03858	1.60017
			Reference values:	BCR2	2		2.17	33.53	417.6	15.85	37.33	12.57	19.66	129.5	23			46.02	337.4	36.07	186.5	12.44	250.6		0.69	2.28	0.302	1.16	683.9	25.08	53.12	6.827	28.26	6.547	1.989	1.077	6.811	6.424	1.313	3.67	3.392	0.5049	4.972	0.785	0.465	10.59	0.05	5.828	1.683
			2012-04-24 14:06:17			BHVO-2	1.2502	38.8832	337.633	262.534	47.5418	110.559	140.827	116.456	21.126	1.5176	1.4223	9.65792	432.925	30.4074	174.928	18.4525	3.39828	0.777741	0.134777	1.05849	0.0884232	0.130317	143.041	17.0938	40.845	5.86552	27.0276	7.475	2.307	1.05018	7.00562	6.17385	1.17264	2.83726	2.38063	0.315945	4.51098	1.09933	0.288925	2.04612	0.0378066	1.27827	0.422898
			Reference values:	BHVO-2	2		1.076	31.83	318.2	287.2	44.89	119.8	129.3	103.9	21.37	1.623	0.7	9.261	394.1	25.91	171.2	18.1	4.07		0.152	1.776	0.1034	0.0996	130.9	15.2	37.53	5.339	24.27	6.023	2.043	0.9392	6.207	5.28	0.9887	2.511	1.994	0.2754	4.47	1.154	0.251	1.653	0.0148	1.224	0.412
			2012-04-24 12:19:03			STM-2B	9.07397	<0.000	0.365033	4.4341	0.932577	4.45831	10.0691	230.227	34.6414	1.48453	4.43806	111.348	796.763	35.4786	1268.8	273.081	6.16264	1.26364	0.538964	7.4592	0.584472	1.63007	618.218	148.081	260.734	24.6658	78.5578	11.638	3.57559	1.49334	8.91518	8.01099	1.48172	4.45936	4.15665	0.587995	29.2475	17.4104	2.10725	12.5499	0.150449	23.6166	8.24513
			2012-04-24 12:50:05			STM-2B	9.33715	<0.000	0.315512	4.56728	0.716226	3.24716	5.21445	232.198	34.9423	1.40737	4.79908	117.04	790.686	34.8397	1257.95	272.933	7.27448	1.2271	0.780756	6.90902	0.523464	1.59762	618.548	143.703	253.412	24.1254	74.7816	10.9332	3.44414	1.30688	8.06775	7.08383	1.33174	4.05611	3.69629	0.502861	27.3459	16.3951	1.74995	12.4777	0.171883	22.6585	8.0145
			2012-04-24 13:13:12			STM-2B	8.96219	<0.000	0.666205	4.0493	0.872715	4.36146	9.88839	222.067	33.4763	1.39263	4.76194	111.992	790.695	35.5938	1243.8	268.174	6.08263	1.1695	0.719186	7.29103	0.332383	1.45142	621.638	145.328	254.666	24.2399	75.2436	11.606	3.42667	1.41718	8.90906	7.89216	1.47515	4.35269	4.28189	0.588405	29.4972	17.3145	1.91997	12.263	0.170661	23.0857	8.04321
			2012-04-24 14:19:12			STM-2B	9.35028	<0.000	0.394103	3.85007	0.778961	4.62189	9.97493	221.444	34.6608	1.37178	4.42286	112.41	790.753	35.1777	1229.55	264.703	6.2878	1.1729	0.541369	7.34556	0.515844	1.51427	609.449	144.101	252.804	24.2067	76.2399	11.104	3.4306	1.28806	7.95798	7.08566	1.33594	3.86314	3.93451	0.54288	26.4593	15.8008	1.78449	12.4779	0.186533	22.8681	7.95667
			2012-04-24 12:19:03			STM-2B	9.14585	<0.000	0.48488	4.55267	0.9537	4.81384	10.2315	232.86	34.6872	1.49109	4.6	109.596	791.257	36.564	1299.21	264.139	6.34017	1.23436	0.551494	10.3412	0.654536	1.63168	622.061	148.386	264.788	25.0474	80.7252	12.0317	3.58842	1.50746	9.14294	8.27583	1.58979	4.50863	4.19275	0.627816	29.9141	17.8306	2.10997	12.6647	0.153615	23.844	8.28831
			2012-04-24 12:50:05			STM-2B	9.41211	<0.000	0.434776	4.68456	0.733697	3.69445	5.28811	234.874	34.989	1.4	4.97431	115.199	785.223	35.9046	1288.1	263.996	7.4512	1.2	0.798908	9.43406	0.593173	1.59941	622.393	143.999	257.352	24.4985	76.8444	11.3051	3.45607	1.31973	8.27349	7.32539	1.42883	4.09934	3.72916	0.537991	27.9688	16.7909	1.74684	12.5918	0.175644	22.877	8.05639
			2012-04-24 13:53:07			STM-2B	9.36448	<0.000	0.605347	3.95964	0.802527	5.87819	5.81104	222.162	33.0895	1.43116	4.79303	110.517	767.092	34.2248	1250.72	257.375	6.35061	1.17955	0.655831	9.09634	0.338646	1.5254	608.497	139.673	250.22	23.8477	76.4787	10.9687	3.39601	1.30851	8.01196	7.15702	1.41626	3.86983	3.95783	0.502958	27.0244	16.227	1.93781	12.0027	0.208304	22.2361	7.89681
			2012-04-24 14:19:12			STM-2B	9.42539	<0.000	0.514293	3.97428	0.797491	4.96503	10.1356	223.882	34.7067	1.35798	4.58424	110.641	785.289	36.2534	1259.02	256.035	6.46524	1.14902	0.553955	10.1538	0.585508	1.51657	613.23	144.397	256.735	24.5811	78.3431	11.4812	3.44243	1.30078	8.16086	7.32726	1.43334	3.90347	3.96905	0.580214	27.0618	16.1823	1.78195	12.5919	0.190701	23.0886	7.99823
			Reference values:	STM-2	3		9.7	1.99	0.4	1.6	0.74	0.9	1.4	220	32			103	756	37	1210	282	5.1		1.4	10	0.42	1.46	590	145	251	24	82	11.7	3.4	1.37	8.6	7.6	1.43	4.2	4	0.54	26.52	36.7	4.7	11.5	0.14	30	8.06
				STM-2	3															37			5.6		1.3	4	0.79	1.39				24.2	77.1	11.7	3.33	1.34	8.5	7.7	1.41	4	4.1	0.6	26.7	15.6	2.5	13.1	0.08	26.8	8.1
				STM-2	3			3.9	0.3	1.4	0.67	0.8	0.9	193	11			100	737	41	1220	260	5.1		1.27	5	0.41	1.47	590	144	251	23.71	77.3	11.6	3.31	1.34	8.5	7.58	1.4	4	4.1	0.59	25.6	16.5	3.51	11.5	0.14	27.4	7.8
					1	Govindaraju, K. (1994). 1994 Compilation of Working Values and Sample Description for 383 Geostandards. Geostandards Newsletter 18, 1-158.
					2	Jochum, K. P., Weis, U., Schwager, B., Stoll, B., Wilson, S. A., Haug, G. H., Andreae, M. O. & Enzweiler, J. (2016). Reference Values Following ISO Guidelines for Frequently Requested Rock Reference Materials. Geostandards and Geoanalytical Research 40, 333-350.
					3	Schudel, G., Lai, V., Gordon, K. & Weis, D. (2015). Trace element characterization of USGS reference materials by HR-ICP-MS and Q-ICP-MS. Chemical Geology 410, 223-236.

## Sheet: GA DLs
Majors	Limit (wt%)	Trace Elements	Limit with XRF	Limit with ICPMS
			(ppm)	(ppm)
SiO2	0.006	Ag	n/a	0.6
TiO2	0.002	As	2	0.5
Al2O3	0.001	Ba	8	0.6
Fe2O3	0.002	Be	n/a	0.3
FeO	0.1	Bi	n/a	0.2
MnO	0.001	Cd	n/a	0.02
MgO	0.004	Ce	10	0.03
CaO	0.002	Co	2	0.2
Na2O	0.004	Cr	2	1.5
K2O	0.002	Cs	8	0.03
P2O5	0.001	Cu	1	0.8
SO3	0.001	Dy	n/a	0.05
MLO	0.001	F	50	n/a
		Er	n/a	0.02
		Eu	n/a	0.02
		Ga	n/a	0.2
		Gd	n/a	0.01
		Ge	n/a	0.2
		Hf	n/a	0.01
		Ho	n/a	0.01
		La	6	0.05
		Lu	n/a	0.01
		Mo	1	0.3
		Nb	1	0.2
		Nd	10	0.2
		Ni	1	2.5
		Pb	2	0.15
		Pr	n/a	0.02
		Rb	1	0.15
		Sb	n/a	0.8
		Sc	2	0.5
		Sm	n/a	0.4
		Sn	n/a	0.1
		Sr	1	0.5
		Ta	n/a	0.05
		Tb	n/a	0.01
		Th	2	0.05
		Tm	n/a	0.02
		U	2	0.01
		V	2	0.5
		W	3	0.1
		Y	1	0.1
		Yb	n/a	0.03
		Zn	1	0.6
		Zr	1	0.2

## Sheet: UM data
Sample No.	Dilution factor	notes	Li 7	Be 9	P 31	Ca43	Sc 45	Ti 49	V 51	Cr 52	Co 59	Ni 60	Cu 65	Zn 66	Ga 71	As semi quant	Rb 85	Sr 86	Y 89	Zr91	Nb 93	107 Ag	114 Cd	In115	Sn 120	Sb 121	Cs 133	Ba135	La139	Ce 140	Pr 141	Nd 146	Sm 149	Eu 151	Gd 160	Tb 159	Dy 161	Ho 165	Er 167	Tm 169	Yb 172	Lu 175	Hf 178	Ta 181	W184	Tl 205	Pb208	Bi209	Th 232
			ppb	ppb	ppb	ppb	ppb	ppb	ppb	ppb	ppb	ppb	ppb	ppb	ppb	ppb	ppb	ppb	ppb	ppb	ppb	ppb	ppb	ppb	ppb	ppb	ppb	ppb	ppb	ppb	ppb	ppb	ppb	ppb	ppb	ppb	ppb	ppb	ppb	ppb	ppb	ppb	ppb	ppb	ppb	ppb	ppb	ppb	ppb
2129611	2937.57		7909.63	1010.32	727004	6.53775e+07	41559.6	1.38117e+07	470506	6216.78	44261.6	7552.64	47715.2	125302	21749.5	2492.96	15422.2	341747	45454.7	112169	13378.8	38.0865	200.739	149.125	83.8237	199.138	694.394	231476	16637.9	40759.1	5935.24	27550.6	7445.31	2382.29	8654.46	1427.12	8787.81	1838.33	4943.5	710.985	4390.84	635.162	3365.85	673.905	289.327	71.9966	3695.8	74.3331	1833.5
2129612	3009.42		9859.21	981.441	1.27204e+06	6.79296e+07	49970.2	1.63247e+07	398893	5041.16	29702.6	3681.39	15652.9	122718	21004.1	8667.96	12981.1	449139	27630.1	68191.1	18054.3	14.462	142.891	96.6062	78.3417	101.924	1291.21	226451	15499.4	34912.9	4908.49	22066.2	5354.9	2263.8	6022.74	928.061	5482.55	1101.14	2891.77	406.957	2511.91	365.34	2091.05	1058.29	392.468	58.893	3660.63	20.3875	1953.02
2129613	2812.64		11403.7	861.456	821881	6.21872e+07	36212.9	1.85847e+07	426917	14660.1	40555.5	8267.49	46343.2	99757.8	19093.1	3672.88	21314.3	320475	24384.5	73321.7	13025	25.2287	158.208	79.2086	188.561	148.022	1124.2	225946	13301.2	28205.1	3784.08	16315.4	4063.93	1559.65	4650.81	756.726	4597.08	966.57	2621.77	377.974	2387.05	344.485	2164.77	862.389	391.501	103.855	4161.56	16.3484	1871.45
2129614	2974.08		8759.23	743.67	1.06145e+06	7.06395e+07	47695.4	1.94723e+07	385725	267.27	38221.8	1058.91	40639	107240	19523.9	799.142	9871.56	316201	34698.7	80956.8	14497.6	14.5436	170.114	105.078	125.541	151.329	1877.3	174785	13884.7	32817.4	4729.03	21773.2	5725.1	2117.48	6778.97	1109.81	6862.35	1416.59	3794.38	544.618	3412.85	496.544	2537.52	884.145	300.399	55.1738	2612.61	37.8312	1192.76
2129615	2988.11		6916.67	777.521	955658	6.62027e+07	46645.8	2.1665e+07	351245	436.239	37816.6	904.868	32650.1	112240	19388.5	3448.82	10751.8	344561	30830.5	102688	17302.9	27.3882	196.745	105.289	41.54	166.709	662.648	195643	13592.2	31498.9	4413.94	19906.5	5189.59	2049.68	6043.45	985.953	6052.03	1250.19	3375.73	485.785	3043.6	447.699	2834.2	1080.91	377.842	58.705	3185.33	17.954	1257.78
2129616	3002.42		14648.6	718.405	735032	5.58847e+07	20737.4	1.35496e+07	532434	56195.6	61486.6	30631.6	76394.2	104015	19963.1	3119.58	16130	313481	20597.3	93525.9	8271.72	29.9996	125.107	57.8736	140.086	290.422	679.45	227177	12082.1	25311.7	3293.09	14068.1	3406.76	1311.6	3898.73	635.879	3907.67	813.697	2244.79	331.766	2120.99	309.774	2379.39	501.802	324.678	87.207	3614.8	33.2578	1635.22
2129617	2989.78		11006.4	920.202	972309	6.21502e+07	41477	1.73563e+07	406838	2923.68	38275.7	5884.07	18723	116129	19954.7	1800.26	18358.4	315850	34592.1	120839	15725	6.0848	214.015	101.652	186.651	317.55	583.65	228062	16457.1	35692.3	4884.8	21873.3	5597.21	1953.88	6556.57	1072.01	6615.22	1384.14	3771.03	547.002	3386.99	495.887	3268.02	921.791	596.908	76.9833	4126.52	23.9266	2175.11
2129618	2903.28		10470.4	841.66	658937	5.85566e+07	21905.7	1.22004e+07	481438	4955.98	56715.5	22353.6	56139.7	95798.7	20010.4	5741.05	12629	358600	21075.1	84797.4	8483.73	17.9927	118.915	59.261	58.696	164.705	1141.37	233844	14067.3	29423.8	3689.73	15087.6	3564.81	1341.39	3964.4	640.628	3981.85	834.771	2290.71	339.627	2181.01	325.162	2529.99	529.568	240.296	65.4014	3704.26	55.7646	1437.95
2129619	3009.04		13153.1	982.88	712760	6.08806e+07	28409.3	1.34613e+07	467151	2359.8	49484.6	13016.3	46050	90558.2	21017.4	1975.62	16069.6	335224	36847.5	128999	11253.8	16.8224	136.091	75.1015	45.5137	72.6777	1123.99	250961	18390.4	43687.1	6045.96	26210.7	6159.06	1685.31	6768.77	1100.41	6860.67	1440.88	4011.87	588.974	3778.81	550.831	3635.41	644.078	242.315	88.2199	3557.25	20.7254	1836.17
2129620	3031.79	lost HCl	16381.2	1120.06	2.9619e+06	6.05781e+07	25023.2	9.59128e+06	139634	10523.8	20149.8	5782.78	11417.6	88487.5	22494.4	2114.64	32470	535156	25945.5	72175.1	11931.8	7.19644	59.2252	44.6243	-82.9692	323.611	2344.99	317125	20233.3	44763.4	6040.91	26913.1	6069.54	2865.11	6528.26	935.075	5243.72	1041.64	2692.32	361.141	2154.05	309.349	2081.12	761.283	368.69	116.284	3910.65	6.68769	3051.15
2129621	3004.02		14151.8	1047.68	730497	6.7526e+07	41082	1.35741e+07	240572	9673.02	24366.2	5406.02	9873.28	102976	21325.1	2073.1	20587.8	426816	20788	108538	13960.6	5.12325	92.1237	74.4682	-101.959	416.323	2176.23	244796	15767.3	32760.3	4154.42	17288.1	4032.38	2081.23	4341.36	685.984	4144.61	840.627	2284.17	330.274	2093.33	309.241	2772.52	892.122	490.097	81.0426	3668.7	8.05236	2124.25
2129622	2987.93		13416.4	1376.71	2.69596e+06	4.54395e+07	33758.8	8.29946e+06	11604.3	-520.531	12622.8	290.482	8076.63	153043	21375.5	795.64	15261.9	366736	47458.7	222263	44705.4	4.70458	169.492	153.828	-228.355	86.6887	856.277	472360	29355.2	67127	9404	42832.4	10172	4088.93	11123.7	1666.44	9698.54	1968.85	5188.54	716.19	4448.1	689.179	4497.7	1932.45	329.45	20.1661	4142.24	2.47562	3513.02
2129623	3017.42	lost HCl	14625.1	1072.68	703618	6.79091e+07	39520.6	1.22521e+07	196930	8017.14	25471	5015.51	8795.01	95938.2	21020.1	707.392	18917.3	444055	22359.1	82624	14005.3	6.62712	93.4583	72.9583	-41.5176	412.722	2017.94	235765	15800.1	33863.7	4389.95	18525.8	4290.44	2082.86	4627.54	729.814	4374.52	890.881	2406.7	349.383	2221.43	325.536	2198.53	907.196	422.254	75.1937	3622.17	7.55117	2026.71
2129624	3038.02		11961.6	835.362	594799	6.35463e+07	35530.3	1.72446e+07	476007	9462.71	41332.1	7780.27	23613.8	104487	19313.1	2159.6	23505.5	341057	17932.9	85128.5	8667.24	17.1264	111.559	71.0859	24.9093	111.641	475.391	252238	11149.9	23159	2968.38	12613.2	3052.82	1404.3	3493.98	570.64	3438.8	713.299	1995.57	296.27	1892.19	278.222	2192.23	unstable380.6454454786	283.346	111.023	4137.22	20.4121	2452.33
2129625	3027.97		5886.43	972.157	1.12229e+06	5.92081e+07	34226.6	1.50784e+07	260657	561.124	30664.7	1455.06	24449.5	101706	20422	2148.95	16656.6	365098	34278.5	123356	14996.3	10.3104	181.105	94.2257	5.13082	351.823	524.178	286207	17399.8	38032.5	5194.95	23084.6	5771.79	2162.43	6554.19	1065.05	6556.57	1362.46	3749.41	545.565	3478.19	513.054	3235.77	935.53	477.049	43.2694	3820.95	6.10422	1849.47
2129626	5208.57		31347	2830.78	198676	1.19214e+07	11486.2	1.54119e+06	2088.92	-207.127	982.109	60.9529	284.983	54104.7	21671.8	1303.81	132142	118260	51818.6	347940	23032.6	1.84884	23.4928	84.6675	1604.57	18.9738	2140.55	946374	51029.3	101257	11836.2	44247.9	9047.24	1830.15	9004.62	1500.76	9167.31	1961.98	5653.95	871.009	5628.29	846.884	8654.53	1537.13	1057.54	280.057	7341.12	3.27936	15250
2129628	4883.21		19052.2	3195.97	138666	1.16593e+07	13826.1	1.35229e+06	360.206	-285.886	482.668	514.516	1564.36	93760.4	22556.1	3613.29	121332	127262	64018.4	455239	25559.3	23.5723	77.9898	111.935	3620.32	204.739	7522.9	954833	56016	110534	13586	52543.5	11115	2161.05	11439.2	1885.53	11474.3	2427.19	6942.87	1052.37	6748.3	1003.49	10855.8	1526.68	1526.22	485.755	16604.9	93.7503	14000.9
2129629	4930.97		8849.94	2139.7	1.25257e+06	3.41534e+07	26668.1	4.44655e+06	8508.82	494.899	4310.56	966.498	4257.52	139155	25760.7	125.415	36123.1	331611	48066.5	541274	16554	-3.78319	253.553	167.963	125.465	30.9877	892.984	894667	38672.8	80447.7	10287.3	42357.2	9252.83	3835.59	9616.18	1506.21	9005.71	1872.89	5194.05	762.714	4949.55	772.947	11136.7	827.618	1228.76	118.093	8551.93	14.16	6412.98
			Preferred data
[truncated: 1 more columns]

## Sheet: UM mineral data
			7 Li	9 Be	43 Ca	45 Sc	49 Ti	51 V	53 Cr	59 Co	60 Ni	65 Cu	66 Zn	71 Ga	75 As	85 Rb	86 Sr	88 Sr	89 Y	90 Zr	91 Zr	93 Nb	98 Mo	114 Cd	115 In	120 Sn	121 Sb	133 Cs	135 Ba	137 Ba	139 La	140 Ce	141 Pr	146 Nd	149 Sm	151 Eu	160 Gd	159 Tb	161 Dy	165 Ho	167 Er	169 Tm	172 Yb	175 Lu	178 Hf	181 Ta	184 W	205 Tl	208/7/6 Pb
Sample Name	Diltion	Notes:	Conc. [ ppb ]	Conc. [ ppb ]	Conc. [ ppb ]	Conc. [ ppb ]	Conc. [ ppb ]	Conc. [ ppb ]	Conc. [ ppb ]	Conc. [ ppb ]	Conc. [ ppb ]	Conc. [ ppb ]	Conc. [ ppb ]	Conc. [ ppb ]	Conc. [ ppb ]	Conc. [ ppb ]	Conc. [ ppb ]	Conc. [ ppb ]	Conc. [ ppb ]	Conc. [ ppb ]	Conc. [ ppb ]	Conc. [ ppb ]	Conc. [ ppb ]	Conc. [ ppb ]	Conc. [ ppb ]	Conc. [ ppb ]	Conc. [ ppb ]	Conc. [ ppb ]	Conc. [ ppb ]	Conc. [ ppb ]	Conc. [ ppb ]	Conc. [ ppb ]	Conc. [ ppb ]	Conc. [ ppb ]	Conc. [ ppb ]	Conc. [ ppb ]	Conc. [ ppb ]	Conc. [ ppb ]	Conc. [ ppb ]	Conc. [ ppb ]	Conc. [ ppb ]	Conc. [ ppb ]	Conc. [ ppb ]	Conc. [ ppb ]	Conc. [ ppb ]	Conc. [ ppb ]	Conc. [ ppb ]	Conc. [ ppb ]	Conc. [ ppb ]
26ti-NM	226878	titanite-epidote	6543.51		2.12914e+08	568352	1.11805e+08	19280.3	149825	7528.66	26170.8	4148.15	234519	4910.84		7957.54	10816		3.65378e+06		1.37156e+07	2.87942e+06	2505.06	-94.39		348628	2907.72	512.798	54976.1	56097.8	8882.91	71290.8	8094.75	59568.2	69309.4	69005.7	211649	63381.2	561972	145390	466356	77317	492622	62967.9	367618	156610	3.44765e+06	16.7342	20731.6
20ti1	36844.9	epidote-titanite (labnote: white dot undissolved)	431.258		1.33847e+08	3217.45	3.92835e+07	188700	17914.7	668.276	1709.88	20738.2	10047.9	1035.76		3817.26	41241.1		31550.8	21999.2	22010.1	46061.4	215.748	23.0051		2174.55	800.622	96.4038	33641.7	33494.5	12892.4	44630.7	6984.32	31681.7	6887.05	10060.5	6776.18	948.941	5388.06	1134.35	3282.12	540.095	3932.05	616.305	846.751	3181.58	6624.73	11.8955	3667.67
20ti2	23748.1	epidote-titanite	192.949		5.35102e+07	1884.93	4.71427e+07	177535	7177.42	365.449	1948.63	-3992.52	13578.4	1072.74		1642.17	24319.3		13762.6	526633	526315	38535.9	116.8	35.0625		1776.14	767.265	55.1138	16228.7	16238.9	7549.53	20841.8	2946.69	12878.4	2700.39	3529.01	2652.42	373.848	2243.21	506.052	1563.98	269.991	2066.29	345.166	12427.8	1721.23	5078.33	6.03242	1913.2
20ilm1	15315.1	Fe-Ti oxide	2999.5		8.06852e+06	24979	1.91329e+08	612908	61023.4	36767.5	10514.6	38528.3	168652	2929.92		355.738	11696.1		8613.7	271810	270751	210432	2615.42	47.1645		3855.01	88.9951	46.5316	10515.8	10649	14410.1	27874.5	3123.63	11519.1	2201.04	509.394	2047.37	299.687	1728.61	353.041	945.84	144.479	958.204	162.932	9574.21	13721.1	14786.6	2.1172	764.296
20hbe1	9955.27	hornblende	4228.58	1305.76	7.33461e+07	233378	2.15918e+07	471065	21707	51323.1	16465	27862.1	179239	22151.7	595.902	3385.74	120353	120715	147114	205065	204489	33344.8	382.106	290.432	406.314	2682.74	41.4566	79.3386	163513	164275	28494.9	100354	17887.2	93850	28783.3	4973.08	32983.8	5199.78	30800.1	6139.19	15783.1	2155.89	12536.2	1729.84	7925.16	1608.11	15725	20.9402	1737.67
20hbe2	10465.3	hornblende	3864.02	1151.58	6.96193e+07	228305	2.36997e+07	463670	22264.2	48356.8	14485.7	12684.8	165823	20722.6	503.224	3072.21	105636	105570	140223	201499	200021	34111.3	413.464	269.738	399.124	2637.79	38.4278	48.9028	155592	155865	26105.2	92585.4	16690.4	87951.6	27020.4	4727.48	31055.7	4911.79	29286.1	5818.91	15021.7	2052.65	11945.3	1650.94	7707.54	1655.15	6886.64	18.1789	1394.94
20hbe3	10266.5	hornblende	2767.31	1253.9	7.16827e+07	232730	2.42336e+07	480491	24509.5	50009.4	15620	15098.6	168813	21148.5	432.497	2975.71	106945	107050	144280	199160	198978	35341.8	472.979	283.38	409.508	2842.05	37.2514	35.4519	155392	155134	27786.7	97940.8	17487.8	91628.4	28080.8	4908.12	32209.7	5080.57	30264.7	6020.66	15519.3	2127.41	12416.8	1718.39	7742.32	1599.56	14039	18.7685	1464.65
26hbe1	9941.36	biotite-chlorite	370211	1148.55	1.14353e+07	48653.4	1.87502e+07	18552.1	2330.83	13058.2	3166.98	-662.616	613067	86603.8	606.435	10560.8	7950.91	8028.22	89402	288481	286849	220339	739.421	34.137	215.333	5022.2	276.497	586.385	75150.5	75664.4	2463.45	8298.28	1292.4	6679.46	3269.79	2279.5	6455.72	1596.62	13101.7	3346.78	10782.3	1795.04	11653.5	1644.04	9894.92	10982.1	63041.3	23.4798	11280.5
26hbe2	10343.3	biotite-chlorite	339649	1091.19	1.14278e+07	73653.5	1.65355e+07	18022.2	1914.36	12595.4	1540.5	-544.766	557613	81908.5	672.346	5384.15	14702.2	14757.7	153441	586614	586576	223797	850.894	26.9751	345.207	10344.1	273.963	399.912	38472.9	38470	10083.8	32571	5271.88	26063	10109.7	3462.97	15123.8	3259.61	24542.4	5898.18	18304.3	2985.94	19616.1	2818.02	18807.3	15065.1	121317	11.5584	8968.83
26hbe3	10542.4	biotite-chlorite	324906	1826.05	9.39731e+06	63193.6	1.60293e+07	16926.5	2516.25	11939.3	1720.31	-439.335	535072	78288.6	597.454	5159.03	11773.2	11863.4	126913	644643	635727	205666	829.562	30.7293	295.063	9342.54	250.907	409.885	34870.4	34788.4	9314.54	34709.9	5945.32	29878.4	11177	2979.29	14906.4	3021.79	21607.3	4994.69	15204.9	2451.08	15911.8	2263.31	20737.2	14651.2	121325	10.8772	8488.97
[truncated: 4 more columns]

## Sheet: UM RMs
Sample No.	notes	Li 7	Be 9	P 31	Ca43	Sc 45	Ti 49	V 51	Cr 52	Co 59	Ni 60	Cu 65	Zn 66	Ga 71	As semi quant	Rb 85	Sr 86	Y 89	Zr91	Nb 93	107 Ag	114 Cd	In115	Sn 120	Sb 121	Cs 133	Ba135	La139	Ce 140	Pr 141	Nd 146	Sm 149	Eu 151	Gd 160	Tb 159	Dy 161	Ho 165	Er 167	Tm 169	Yb 172	Lu 175	Hf 178	Ta 181	W184	Tl 205	Pb208	Bi209	Th 232	U 238
		ppb	ppb	ppb	ppb	ppb	ppb	ppb	ppb	ppb	ppb	ppb	ppb	ppb	ppb	ppb	ppb	ppb	ppb	ppb	ppb	ppb	ppb	ppb	ppb	ppb	ppb	ppb	ppb	ppb	ppb	ppb	ppb	ppb	ppb	ppb	ppb	ppb	ppb	ppb	ppb	ppb	ppb	ppb	ppb	ppb	ppb	ppb	ppb
W-2d-27jul	calibration standard	9120.33	623.912	565262	7.69185e+07	35899.7	6.27907e+06	261541	91917.6	44566.4	70109.7	103425	77254.6	17368.9	958.93	19622.6	194621	20189.1	87079.3	7231.87	37.0233	79.168	64.13	1964.96	743.322	881.112	169513	10498.1	23159.8	3015.13	12931.1	3267.14	1078.31	3722.32	613.082	3833.88	803.931	2230.56	327.429	2070.79	303.919	2324.73	457.088	240.413	89.7292	7784.4	24.158	2124.69	504.619
w2a-8 27jul	calibration standard	9182.57	613.163	568741	7.82012e+07	36189.9	6.37007e+06	261634	93375	44499	69914.6	102716	76829.7	17460.2	660.334	19924.5	194967	20062.8	88392.7	7304.29	39.5304	75.5501	64.9143	1940	686.046	892.891	169791	10536.3	23254.3	3032.32	12897.6	3265.52	1103.97	3698.7	616.498	3790.61	802.858	2216.3	326.982	2049.76	299.549	2377.37	452.211	239.724	90.1811	7355.73	23.8943	2090.45	505.257
BIR-1-R	basalt standard	3115.8	94.5213	97602.4	9.9708e+07	46309	5.963e+06	342279	430479	56461.7	179852	122062	87752.3	15848.7	20.2402	189.344	108900	14774.5	14933.5	522.497	30.1185	96.6205	57.3983	840.482	462.574	4.90419	6424.97	602.137	1896.39	378.878	2369.8	1091.87	522.73	1888.49	373.127	2567.07	590.181	1717.97	258.481	1680.12	253.511	585.387	36.2942	6.746	1.34147	3018.3	4.74197	29.3087	10.5981
BHVO2-L	basalt standard	4474.39	1030.48	1.23739e+06	8.29206e+07	32433.3	1.62092e+07	311132	297503	45755	119085	126413	102757	21008.1	413.821	9134.74	391219	24076.7	173880	17891.2	46.7657	97.2888	90.9821	2010.72	81.5357	96.0798	130983	15114.5	37368.2	5376.96	24316.2	5958.77	2031.55	6253.6	943.476	5270.11	1007.65	2505.03	335.319	2007.57	276.594	4438.54	1136.84	197.875	19.2671	1477.27	11.0745	1197.49	430.11

## Sheet: UM DLs
	Detection Limits
	ppb	ppb	ppb
Dilution factor	1	3000	5000
	solution	gabbro	granite
7 Li	0.00110523	3.31568	5.52614
9 Be	0.000403366	1.2101	2.01683
31 P	0.148239	444.718	741.197
43 Ca	2.89336	8680.07	14466.8
45 Sc	0.00015	0.45	0.75
49 Ti	0.0131958	39.5873	65.9788
51 V	0.0268891	80.6672	134.445
53 Cr	0.0842219	252.666	421.109
59 Co	0.00129589	3.88767	6.47944
60 Ni	0.0206032	61.8095	103.016
65 Cu	0.00409298	12.2789	20.4649
66 Zn	3.91971e-05	0.117591	0.195986
71 Ga	0.000946623	2.83987	4.73312
75 As	0.0367081	110.124	183.541
85 Rb	0.000145582	0.436747	0.727912
86 Sr	0.0089922	26.9766	44.961
89 Y	0.000114979	0.344938	0.574897
91 Zr	0.00338177	10.1453	16.9088
93 Nb	4.12299e-05	0.12369	0.20615
98 Mo	0.0133774	40.1323	66.8871
107 Ag	0.000236329	0.708988	1.18165
114 Cd	0.000185117	0.555352	0.925586
115 In	0.000121132	0.363395	0.605658
120 Sn	0.00504856	15.1457	25.2428
121 Sb	0.0028293	8.48791	14.1465
133 Cs	0.00026265	0.787951	1.31325
135 Ba	0.00501073	15.0322	25.0536
139 La	0.000108286	0.324858	0.541429
140 Ce	5.7294e-05	0.171882	0.28647
141 Pr	1.51431e-05	0.0454294	0.0757156
146 Nd	1.5866e-05	0.047598	0.07933
149 Sm	0.00564448	16.9335	28.2224
151 Eu	2.55988e-05	0.0767964	0.127994
159 Tb	5.67643e-05	0.170293	0.283822
160 Gd	3.96697e-05	0.119009	0.198349
161 Dy	0.000393599	1.1808	1.968
165 Ho	1.76109e-05	0.0528328	0.0880547
167 Er	2.67854e-05	0.0803562	0.133927
169 Tm	8.58599e-06	0.025758	0.0429299
172 Yb	3.68712e-05	0.110614	0.184356
175 Lu	1.01528e-05	0.0304583	0.0507639
178 Hf	0.000268807	0.806421	1.34403
181 Ta	3.77094e-05	0.113128	0.188547
184 W	0.000177443	0.532328	0.887213
205 Tl	4.93174e-05	0.147952	0.246587
208 Pb	7.79058e-05	0.233717	0.389529
209 Bi	4.9938e-05	0.149814	0.24969
232 Th	1.00465e-05	0.0301395	0.0502325
238 U	9.56385e-05	0.286916	0.478193
